# Supplementary material for: Warming Trends and Bleaching Stress of the World’s Coral Reefs 1985–2012
Source: PubMed Central journal article supplement (PMC5138844; doi:10.1038/srep38402), 2016-12-06
Supplement: srep38402-s1.pdf [file srep38402-s1.pdf]

**Supplementary Material: Warming Trends and Bleaching Stress of the World's Coral Reefs 1985-2012**, SF Heron, JA Maynard, R van Hooidonk, CM Eakin. *Note: Throughout the supplementary material, reef regions are as per Burke et al. (2011)<sup>1</sup>.*

Table S1. Global summary of the data distribution for (a) annual and (b) warm-season trends; (c) bleaching-level thermal stress events; (d) warmest month; (e) stress onset; and (f) warm-season temperature variability, 1985-2012. Warm-season temperature variability is the standard deviation of warm-season temperatures expressed as a percentage of the climatological range. These data correspond to histograms presented in Figure 1a-f. Data distribution among reef regions for these three variables is presented in Tables S2-3, S5, S8, S10-11.

| °C/decade                            | (a) SST trend (°C/decade) |      | (b) Warm-season trend (°C/decade) |      |
|--------------------------------------|---------------------------|------|-----------------------------------|------|
|                                      | Pixels                    | %    | Pixels                            | %    |
| <i>Average±SD</i><br>(% significant) | 0.20±0.11<br>(60%)        |      | 0.16±0.14<br>(30%)                |      |
| -0.5 to -0.4                         | 2                         | 0.0  | 0                                 | -    |
| -0.4 to -0.3                         | 0                         | -    | 27                                | 0.0  |
| -0.3 to -0.2                         | 13                        | 0.0  | 193                               | 0.3  |
| -0.2 to -0.1                         | 356                       | 0.6  | 1170                              | 1.9  |
| -0.1 to 0.0                          | 1492                      | 2.5  | 5552                              | 9.1  |
| 0.0 to 0.1                           | 9471                      | 15.6 | 15838                             | 26.1 |
| 0.1 to 0.2                           | 18374                     | 30.3 | 17629                             | 29.0 |
| 0.2 to 0.3                           | 20369                     | 33.6 | 11299                             | 18.6 |
| 0.3 to 0.4                           | 8382                      | 13.8 | 5459                              | 9.0  |
| 0.4 to 0.5                           | 1902                      | 3.1  | 2278                              | 3.8  |
| 0.5 to 0.6                           | 342                       | 0.6  | 813                               | 1.3  |
| 0.6 to 0.7                           | 7                         | 0.0  | 357                               | 0.6  |
| 0.7 to 0.8                           | 0                         | -    | 87                                | 0.1  |
| 0.8 to 0.9                           | 0                         | -    | 7                                 | 0.0  |
| 0.9 to 1.0                           | 0                         | -    | 1                                 | 0.0  |

Trends shading: light grey denotes negative values; dark grey denotes values that exceeded the global average plus one SD (~0.30 °C/decade for both annual SST and warm-season trends).

| (c) Bleaching-Level thermal stress events (#) |         |      |
|-----------------------------------------------|---------|------|
| #                                             | Pixels  | %    |
| <i>Average±SD</i>                             | 4.6±3.4 |      |
| 0                                             | 4185    | 6.9  |
| 1                                             | 7204    | 11.9 |
| 2                                             | 8405    | 13.8 |
| 3                                             | 7960    | 13.1 |
| 4                                             | 7078    | 11.7 |
| 5                                             | 6047    | 10.0 |
| 6                                             | 4795    | 7.9  |
| 7                                             | 3674    | 6.1  |
| 8                                             | 3022    | 5.0  |
| 9                                             | 2458    | 4.0  |
| 10                                            | 1886    | 3.1  |
| 11                                            | 1389    | 2.3  |
| 12                                            | 1004    | 1.7  |
| 13                                            | 669     | 1.1  |
| 14                                            | 455     | 0.7  |
| 15                                            | 273     | 0.4  |
| 16                                            | 127     | 0.2  |
| 17                                            | 47      | 0.1  |
| 18                                            | 26      | 0.0  |
| 19                                            | 6       | 0.0  |

Events shading: light grey denotes <1 event/decade on average; dark grey denotes >2 events/decade.

<sup>1</sup> Burke, L., Reyntar, K., Spalding, M., & Perry, A. *Reefs At Risk Revisited* (World Resources Institute, 2011).

Table S1. Global summary of the data distribution for (a) annual and (b) warm-season trends; (c) bleaching-level thermal stress events; (d) warmest month; (e) stress onset; and (f) warm-season temperature variability, 1985-2012. Warm-season temperature variability is the standard deviation of warm-season temperatures expressed as a percentage of the climatological range. These data correspond to histograms presented in Figure 1a-f. Data distribution among reef regions for these three variables is presented in Tables S2-3, S5, S8, S10-11.

| <b>(d) Warmest month</b> |        |      |
|--------------------------|--------|------|
| Month                    | Pixels | %    |
| January                  | 4967   | 8.2  |
| February                 | 8311   | 13.7 |
| March                    | 5358   | 8.8  |
| April                    | 8776   | 14.5 |
| May                      | 6388   | 10.5 |
| June                     | 6508   | 10.7 |
| July                     | 792    | 1.3  |
| August                   | 4475   | 7.4  |
| September                | 5219   | 8.6  |
| October                  | 4542   | 7.5  |
| November                 | 2649   | 4.4  |
| December                 | 2725   | 4.5  |

| <b>(e) Stress onset (month)</b> |        |      |
|---------------------------------|--------|------|
| Month                           | Pixels | %    |
| January                         | 9889   | 16.3 |
| February                        | 7191   | 11.8 |
| March                           | 2981   | 4.9  |
| April                           | 3983   | 6.6  |
| May                             | 3501   | 5.8  |
| June                            | 3236   | 5.3  |
| July                            | 6540   | 10.8 |
| August                          | 8173   | 13.5 |
| September                       | 3196   | 5.3  |
| October                         | 948    | 1.6  |
| November                        | 1655   | 2.7  |
| December                        | 5228   | 8.6  |
| [no event]                      | 4189   | 6.9  |

| <b>(f) Warm-season variability (% climatological range)</b> |        |              |
|-------------------------------------------------------------|--------|--------------|
| %                                                           | Pixels | %            |
| <i>Average±SD</i>                                           |        | <i>16±11</i> |
| 0-5                                                         | 747    | 1.2          |
| 5-10                                                        | 14540  | 23.9         |
| 10-15                                                       | 19562  | 32.2         |
| 15-20                                                       | 11938  | 19.7         |
| 20-25                                                       | 6235   | 10.3         |
| 25-30                                                       | 3285   | 5.4          |
| 30-35                                                       | 1553   | 2.6          |
| 35-40                                                       | 862    | 1.4          |
| 40-45                                                       | 609    | 1            |
| 45-50                                                       | 392    | 0.6          |
| 50-55                                                       | 296    | 0.5          |
| 55-60                                                       | 152    | 0.3          |
| 60-65                                                       | 96     | 0.2          |
| 65-70                                                       | 63     | 0.1          |
| 70+                                                         | 380    | 0.6          |

Warm-season variability shading: light grey denotes the approximately one-quarter of sites with highest variability (>20%).

Table S2. Regional data distribution for trend in annual temperatures (°C/decade), 1985-2012. These data correspond to the histograms shown on the right side of Figure S1. Negative values (temperatures decreased during the study period) are shown in light grey shade, and values greater than the global average plus one standard deviation ( $0.20 + 0.10$  °C/decade) are in dark grey shade.

| <b>SST trend</b><br>°C/decade               | <b>Middle East</b>               |      | <b>Indian Ocean</b>              |      | <b>Southeast Asia</b>            |      | <b>Australia</b>                |      | <b>Pacific Ocean</b>             |      | <b>Atlantic Ocean</b>            |      |
|---------------------------------------------|----------------------------------|------|----------------------------------|------|----------------------------------|------|---------------------------------|------|----------------------------------|------|----------------------------------|------|
|                                             | Pixels                           | %    | Pixels                           | %    | Pixels                           | %    | Pixels                          | %    | Pixels                           | %    | Pixels                           | %    |
| <i>Average±SD</i><br><i>(% significant)</i> | <i>0.32±0.13</i><br><i>(47%)</i> |      | <i>0.21±0.05</i><br><i>(84%)</i> |      | <i>0.20±0.07</i><br><i>(79%)</i> |      | <i>0.08±0.09</i><br><i>(8%)</i> |      | <i>0.24±0.12</i><br><i>(58%)</i> |      | <i>0.17±0.12</i><br><i>(55%)</i> |      |
| -0.5 to -0.4                                | 2                                | 0.1  | 0                                | -    | 0                                | -    | 0                               | -    | 0                                | -    | 0                                | -    |
| -0.4 to -0.3                                | 0                                | -    | 0                                | -    | 0                                | -    | 0                               | -    | 0                                | -    | 0                                | -    |
| -0.3 to -0.2                                | 0                                | -    | 0                                | -    | 0                                | -    | 0                               | -    | 11                               | 0.1  | 2                                | 0.0  |
| -0.2 to -0.1                                | 2                                | 0.1  | 0                                | -    | 0                                | -    | 144                             | 1.8  | 185                              | 1.2  | 25                               | 0.3  |
| -0.1 to 0.0                                 | 14                               | 0.4  | 0                                | -    | 17                               | 0.1  | 596                             | 7.6  | 478                              | 3.0  | 387                              | 5.2  |
| 0.0 to 0.1                                  | 137                              | 3.7  | 69                               | 0.9  | 1193                             | 6.6  | 4482                            | 57.4 | 1707                             | 10.7 | 1883                             | 25.3 |
| 0.1 to 0.2                                  | 731                              | 19.5 | 3209                             | 42.0 | 7621                             | 42.2 | 2135                            | 27.3 | 2312                             | 14.4 | 2366                             | 31.8 |
| 0.2 to 0.3                                  | 726                              | 19.4 | 4050                             | 53.1 | 7888                             | 43.7 | 182                             | 2.3  | 5862                             | 36.6 | 1661                             | 22.4 |
| 0.3 to 0.4                                  | 1003                             | 26.8 | 305                              | 4.0  | 1313                             | 7.3  | 119                             | 1.5  | 4924                             | 30.7 | 718                              | 9.7  |
| 0.4 to 0.5                                  | 943                              | 25.2 | 0                                | -    | 33                               | 0.2  | 147                             | 1.9  | 454                              | 2.8  | 325                              | 4.4  |
| 0.5 to 0.6                                  | 188                              | 5.0  | 0                                | -    | 1                                | 0.0  | 2                               | 0.0  | 91                               | 0.6  | 60                               | 0.8  |
| 0.6 to 0.7                                  | 1                                | 0.0  | 0                                | -    | 0                                | -    | 0                               | -    | 2                                | 0    | 4                                | 0.1  |

Table S3. Regional data distribution for trend in warm-season temperatures (°C/decade), 1985-2012. These data correspond to the histograms shown on the right side of Figure 3. Negative values (temperatures decreased during the study period) are shown in light grey shade, and values greater than the global average plus one standard deviation ( $0.16 + 0.14$  °C/decade) are in dark grey shade.

| <b>WS trend</b><br>(°C/decade)       | <b>Middle East</b>        |      | <b>Indian Ocean</b>       |      | <b>Southeast Asia</b>     |      | <b>Australia</b>         |      | <b>Pacific Ocean</b>      |      | <b>Atlantic Ocean</b>     |      |
|--------------------------------------|---------------------------|------|---------------------------|------|---------------------------|------|--------------------------|------|---------------------------|------|---------------------------|------|
|                                      | Pixels                    | %    | Pixels                    | %    | Pixels                    | %    | Pixels                   | %    | Pixels                    | %    | Pixels                    | %    |
| <i>Average±SD</i><br>(% significant) | <i>0.37±0.17</i><br>(47%) |      | <i>0.11±0.08</i><br>(12%) |      | <i>0.11±0.09</i><br>(21%) |      | <i>0.05±0.12</i><br>(5%) |      | <i>0.15±0.13</i><br>(29%) |      | <i>0.32±0.11</i><br>(92%) |      |
| -0.4 to -0.3                         | 0                         | -    | 0                         | -    | 0                         | -    | 1                        | 0.0  | 26                        | 0.2  | 0                         | -    |
| -0.3 to -0.2                         | 1                         | 0.0  | 0                         | -    | 0                         | -    | 63                       | 0.8  | 129                       | 0.8  | 0                         | -    |
| -0.2 to -0.1                         | 17                        | 0.5  | 30                        | 0.4  | 108                       | 0.6  | 606                      | 7.8  | 404                       | 2.5  | 5                         | 0.1  |
| -0.1 to 0.0                          | 18                        | 0.5  | 486                       | 6.4  | 1630                      | 9.0  | 1849                     | 23.7 | 1518                      | 9.5  | 51                        | 0.7  |
| 0.0 to 0.1                           | 127                       | 3.4  | 2938                      | 38.5 | 6443                      | 35.7 | 3018                     | 38.7 | 3125                      | 19.5 | 187                       | 2.5  |
| 0.1 to 0.2                           | 529                       | 14.1 | 3093                      | 40.5 | 6927                      | 38.3 | 1633                     | 20.9 | 4791                      | 29.9 | 656                       | 8.8  |
| 0.2 to 0.3                           | 673                       | 18.0 | 974                       | 12.8 | 2629                      | 14.6 | 390                      | 5.0  | 4421                      | 27.6 | 2128                      | 29.8 |
| 0.3 to 0.4                           | 750                       | 20.0 | 109                       | 1.4  | 287                       | 1.6  | 102                      | 1.3  | 1492                      | 9.3  | 2719                      | 36.6 |
| 0.4 to 0.5                           | 791                       | 21.1 | 3                         | 0.0  | 39                        | 0.2  | 88                       | 1.1  | 112                       | 0.7  | 1245                      | 16.8 |
| 0.5 to 0.6                           | 510                       | 13.6 | 0                         | -    | 3                         | 0.0  | 29                       | 0.4  | 8                         | 0.0  | 263                       | 3.5  |
| 0.6 to 0.7                           | 281                       | 7.5  | 0                         | -    | 0                         | -    | 13                       | 0.2  | 0                         | -    | 63                        | 0.8  |
| 0.7 to 0.8                           | 49                        | 1.3  | 0                         | -    | 0                         | -    | 11                       | 0.1  | 0                         | -    | 27                        | 0.4  |
| 0.8 to 0.9                           | 1                         | 0.0  | 0                         | -    | 0                         | -    | 3                        | 0.0  | 0                         | -    | 3                         | 0.0  |
| 0.9 to 1.0                           | 0                         | -    | 0                         | -    | 0                         | -    | 1                        | 0.0  | 0                         | -    | 0                         | -    |

Table S4. Regional differences between the annual and warm-season trends, 1985-2012. The line separating the second and third rows corresponds to the line of unity in Figure 4; values above refer to pixels where the warm-season trend is greater than the annual trend and values below refer to pixels where the annual trend is greater than the warm-season trend.

| <b>Trend difference</b><br>(°C/decade) | <b>Global</b> |      | <b>Middle East</b> |      | <b>Indian Ocean</b> |      | <b>Southeast Asia</b> |      | <b>Australia</b> |      | <b>Pacific Ocean</b> |      | <b>Atlantic Ocean</b> |      |
|----------------------------------------|---------------|------|--------------------|------|---------------------|------|-----------------------|------|------------------|------|----------------------|------|-----------------------|------|
|                                        | Pixels        | %    | Pixels             | %    | Pixels              | %    | Pixels                | %    | Pixels           | %    | Pixels               | %    | Pixels                | %    |
| ≤-0.1                                  | 7177          | 11.8 | 923                | 24.6 | 90                  | 1.2  | 258                   | 1.4  | 377              | 4.8  | 744                  | 4.6  | 4785                  | 64.4 |
| -0.1-0                                 | 11195         | 18.4 | 1999               | 53.3 | 656                 | 8.6  | 1889                  | 10.5 | 2091             | 26.8 | 2395                 | 14.9 | 2165                  | 29.1 |
| 0-0.1                                  | 20134         | 33.2 | 678                | 18.1 | 2725                | 35.7 | 7400                  | 41.0 | 3806             | 48.8 | 5081                 | 31.7 | 444                   | 6.0  |
| >0.1                                   | 22204         | 36.6 | 147                | 3.9  | 4162                | 54.5 | 8519                  | 47.2 | 1533             | 19.6 | 7806                 | 48.7 | 37                    | 0.5  |

Table S5. Frequency of bleaching-level thermal stress events, 1985-2012. These data correspond to histograms presented in Figure 5. Bleaching-level stress defined as DHW  $\geq 4$  °C-weeks. Light-grey shade denotes pixels that experienced 0-2 events (<1/decade) on average, and dark-grey shade denotes pixels that experienced  $\geq 6$  events (>2/decade) on average.

| Number of events                 | Middle East                   |      | Indian Ocean                  |      | Southeast Asia                |      | Australia                     |      | Pacific Ocean                 |      | Atlantic Ocean                |     |
|----------------------------------|-------------------------------|------|-------------------------------|------|-------------------------------|------|-------------------------------|------|-------------------------------|------|-------------------------------|-----|
|                                  | Pixels                        | %    | Pixels                        | %    | Pixels                        | %    | Pixels                        | %    | Pixels                        | %    | Pixels                        | %   |
| <i>Average<math>\pm</math>SD</i> | <i>9.1<math>\pm</math>3.6</i> |      | <i>3.5<math>\pm</math>2.5</i> |      | <i>3.6<math>\pm</math>2.5</i> |      | <i>3.4<math>\pm</math>2.8</i> |      | <i>4.5<math>\pm</math>3.1</i> |      | <i>6.9<math>\pm</math>3.9</i> |     |
| 0                                | 8                             | 0.2  | 413                           | 5.4  | 1192                          | 6.6  | 1034                          | 13.2 | 1388                          | 8.7  | 150                           | 2.0 |
| 1                                | 50                            | 1.3  | 1319                          | 17.3 | 2448                          | 13.6 | 1145                          | 14.7 | 1888                          | 11.8 | 354                           | 4.8 |
| 2                                | 97                            | 2.6  | 1423                          | 18.6 | 3299                          | 18.3 | 1212                          | 15.5 | 1836                          | 11.5 | 538                           | 7.2 |
| 3                                | 157                           | 4.2  | 1242                          | 16.3 | 3037                          | 16.8 | 1112                          | 14.2 | 1777                          | 11.1 | 635                           | 8.5 |
| 4                                | 199                           | 5.3  | 937                           | 12.3 | 2532                          | 14.0 | 920                           | 11.8 | 1821                          | 11.4 | 669                           | 9.0 |
| 5                                | 216                           | 5.8  | 760                           | 10.0 | 1931                          | 10.7 | 758                           | 9.7  | 1705                          | 10.6 | 677                           | 9.1 |
| 6                                | 212                           | 5.7  | 516                           | 6.8  | 1400                          | 7.7  | 536                           | 6.9  | 1510                          | 9.4  | 621                           | 8.4 |
| 7                                | 227                           | 6.1  | 393                           | 5.1  | 834                           | 4.6  | 374                           | 4.8  | 1229                          | 7.7  | 617                           | 8.3 |
| 8                                | 275                           | 7.3  | 281                           | 3.7  | 563                           | 3.1  | 276                           | 3.5  | 992                           | 6.2  | 635                           | 8.5 |
| 9                                | 413                           | 11.0 | 160                           | 2.1  | 384                           | 2.1  | 203                           | 2.6  | 708                           | 4.4  | 590                           | 7.9 |
| 10                               | 438                           | 11.7 | 100                           | 1.3  | 207                           | 1.1  | 111                           | 1.4  | 500                           | 3.1  | 530                           | 7.1 |
| 11                               | 398                           | 10.6 | 33                            | 0.4  | 117                           | 0.6  | 59                            | 0.8  | 318                           | 2.0  | 464                           | 6.2 |
| 12                               | 386                           | 10.3 | 19                            | 0.2  | 63                            | 0.3  | 30                            | 0.4  | 186                           | 1.2  | 320                           | 4.3 |
| 13                               | 277                           | 7.4  | 13                            | 0.2  | 33                            | 0.2  | 12                            | 0.2  | 102                           | 0.6  | 232                           | 3.1 |
| 14                               | 209                           | 5.6  | 16                            | 0.2  | 14                            | 0.1  | 9                             | 0.1  | 43                            | 0.3  | 164                           | 2.2 |
| 15                               | 101                           | 2.7  | 5                             | 0.1  | 6                             | 0.0  | 9                             | 0.1  | 20                            | 0.1  | 132                           | 1.8 |
| 16                               | 58                            | 1.5  | 1                             | 0.0  | 5                             | 0.0  | 5                             | 0.1  | 3                             | 0.0  | 55                            | 0.7 |
| 17                               | 18                            | 0.5  | 0                             | 0.0  | 1                             | 0.0  | 2                             | 0.0  | 0                             | -    | 26                            | 0.3 |
| 18                               | 7                             | 0.2  | 2                             | 0.0  | 0                             | -    | 0                             | -    | 0                             | -    | 17                            | 0.2 |
| 19                               | 1                             | 0.0  | 0                             | -    | 0                             | -    | 0                             | -    | 0                             | -    | 5                             | 0.1 |

Table S6. Frequency of mortality-level thermal stress events, 1985-2012. These data correspond to histograms presented in Figure S2. Mortality-level stress defined as  $DHW \geq 8$  °C-weeks. Light-grey shade denotes pixels that experienced 0-2 events (<1/decade) on average, and dark-grey shade denotes pixels that experienced  $\geq 6$  events (>2/decade) on average.

| Number of events  | Global         |      | Middle East    |      | Indian Ocean   |      | Southeast Asia |      | Australia      |      | Pacific Ocean  |      | Atlantic Ocean |      |
|-------------------|----------------|------|----------------|------|----------------|------|----------------|------|----------------|------|----------------|------|----------------|------|
|                   | Pixels         | %    | Pixels         | %    | Pixels         | %    | Pixels         | %    | Pixels         | %    | Pixels         | %    | Pixels         | %    |
| <i>Average±SD</i> | <i>1.3±1.8</i> |      | <i>3.6±2.7</i> |      | <i>1.0±1.2</i> |      | <i>0.9±1.1</i> |      | <i>0.7±1.4</i> |      | <i>1.3±1.6</i> |      | <i>2.4±2.5</i> |      |
| 0                 | 25809          | 42.5 | 591            | 15.8 | 3200           | 41.9 | 8519           | 47.2 | 5011           | 64.2 | 6683           | 41.7 | 1805           | 24.3 |
| 1                 | 15768          | 26.0 | 407            | 10.9 | 2733           | 35.8 | 5347           | 29.6 | 1557           | 19.9 | 4054           | 25.3 | 1670           | 22.5 |
| 2                 | 8332           | 13.7 | 450            | 12.0 | 959            | 12.6 | 2762           | 15.3 | 627            | 8.0  | 2428           | 15.2 | 1106           | 14.9 |
| 3                 | 4386           | 7.2  | 461            | 12.3 | 437            | 5.7  | 956            | 5.3  | 249            | 3.2  | 1421           | 8.9  | 862            | 11.6 |
| 4                 | 2399           | 4.0  | 499            | 13.3 | 177            | 2.3  | 289            | 1.6  | 118            | 1.5  | 670            | 4.2  | 646            | 8.7  |
| 5                 | 1550           | 2.6  | 469            | 12.5 | 68             | 0.9  | 111            | 0.6  | 84             | 1.1  | 380            | 2.4  | 438            | 5.9  |
| 6                 | 974            | 1.6  | 326            | 8.7  | 23             | 0.3  | 52             | 0.3  | 76             | 1.0  | 179            | 1.1  | 318            | 4.3  |
| 7                 | 621            | 1.0  | 212            | 5.7  | 8              | 0.1  | 14             | 0.1  | 52             | 0.7  | 120            | 0.7  | 215            | 2.9  |
| 8                 | 368            | 0.6  | 138            | 3.7  | 6              | 0.1  | 3              | 0.0  | 14             | 0.2  | 52             | 0.3  | 155            | 2.1  |
| 9                 | 258            | 0.4  | 106            | 2.8  | 14             | 0.2  | 8              | 0.0  | 13             | 0.2  | 30             | 0.2  | 87             | 1.2  |
| 10                | 122            | 0.2  | 53             | 1.4  | 5              | 0.1  | 3              | 0.0  | 3              | 0.0  | 8              | 0.0  | 50             | 0.7  |
| 11                | 72             | 0.1  | 24             | 0.6  | 3              | 0.0  | 2              | 0.0  | 2              | 0.0  | 1              | 0.0  | 40             | 0.5  |
| 12                | 26             | 0.0  | 7              | 0.2  | 0              | -    | 0              | -    | 1              | 0.0  | 0              | -    | 18             | 0.2  |
| 13                | 16             | 0.0  | 4              | 0.1  | 0              | -    | 0              | -    | 0              | -    | 0              | -    | 12             | 0.2  |
| 14                | 8              | 0.0  | 0              | -    | 0              | -    | 0              | -    | 0              | -    | 0              | -    | 8              | 0.1  |
| 15                | 1              | 0.0  | 0              | -    | 0              | -    | 0              | -    | 0              | -    | 0              | -    | 1              | 0.0  |

Table S7a. Annual exposure to bleaching-level thermal stress for all reef locations globally and within reef regions, 1985-2012. These data correspond to the histograms presented in the left panels of Figure 6. The three years in which the greatest percentage of pixels experienced bleaching-level thermal stress events are labeled as 1, 2 and 3 and are shaded in grey.

| Year | Global |         | Middle East |         | Indian Ocean |         | Southeast Asia |         | Australia |         | Pacific Ocean |         | Atlantic Ocean |         |
|------|--------|---------|-------------|---------|--------------|---------|----------------|---------|-----------|---------|---------------|---------|----------------|---------|
|      | Pixels | %       | Pixels      | %       | Pixels       | %       | Pixels         | %       | Pixels    | %       | Pixels        | %       | Pixels         | %       |
| 1985 | 1962   | 3.2     | 0           | -       | 39           | 0.5     | 514            | 2.8     | 582       | 7.5     | 786           | 4.9     | 41             | 0.6     |
| 1986 | 4229   | 7.0     | 339         | 9.0     | 94           | 1.2     | 648            | 3.6     | 991       | 12.7    | 2142          | 13.4    | 15             | 0.2     |
| 1987 | 7068   | 11.6    | 275         | 7.3     | 1860         | 24.4    | 1333           | 7.4     | 1507      | 19.3    | 1308          | 8.2     | 785            | 10.6    |
| 1988 | 7732   | 12.7    | 887         | 23.7    | 1372         | 18.0    | 2053           | 11.4    | 1465      | 18.8    | 1740          | 10.9    | 215            | 2.9     |
| 1989 | 4017   | 6.6     | 71          | 1.9     | 43           | 0.6     | 797            | 4.4     | 1685      | 21.6    | 1320          | 8.2     | 101            | 1.4     |
| 1990 | 5154   | 8.5     | 86          | 2.3     | 323          | 4.2     | 1588           | 8.8     | 899       | 11.5    | 1275          | 8.0     | 983            | 13.2    |
| 1991 | 3306   | 5.4     | 0           | -       | 710          | 9.3     | 537            | 3.0     | 178       | 2.3     | 1609          | 10.0    | 272            | 3.7     |
| 1992 | 2051   | 3.4     | 61          | 1.6     | 242          | 3.2     | 739            | 4.1     | 551       | 7.1     | 428           | 2.7     | 30             | 0.4     |
| 1993 | 1234   | 2.0     | 321         | 8.6     | 61           | 0.8     | 357            | 2.0     | 20        | 0.3     | 197           | 1.2     | 278            | 3.7     |
| 1994 | 3490   | 5.7     | 1414        | 37.7    | 27           | 0.4     | 1062           | 5.9     | 151       | 1.9     | 706           | 4.4     | 130            | 1.7     |
| 1995 | 10836  | 17.8    | 2065        | 55.1    | 1032         | 13.5    | 1646           | 9.1     | 993       | 12.7    | 1925          | 12.0    | 3175           | 42.7    |
| 1996 | 9630   | 15.9    | 1072        | 28.6    | 528          | 6.9     | 1932           | 10.7    | 704       | 9.0     | 5123          | 32.0    | 271            | 3.6     |
| 1997 | 5228   | 8.6     | 1007        | 26.9    | 268          | 3.5     | 549            | 3.0     | 363       | 4.6     | 1801          | 11.2    | 1240           | 16.7    |
| 1998 | 29031  | 47.8(1) | 3151        | 84.1(1) | 5358         | 70.2(1) | 10238          | 56.7(2) | 2407      | 30.8(1) | 3569          | 22.3    | 4308           | 58.0(3) |
| 1999 | 12491  | 20.6    | 2189        | 58.4    | 335          | 4.4     | 2204           | 12.2    | 1267      | 16.2    | 3756          | 23.4    | 2740           | 36.9    |
| 2000 | 9535   | 15.7    | 656         | 17.5    | 83           | 1.1     | 2450           | 13.6    | 513       | 6.6     | 5348          | 33.4(2) | 485            | 6.5     |
| 2001 | 11592  | 19.1    | 1925        | 51.4    | 299          | 3.9     | 3510           | 19.4    | 259       | 3.3     | 4800          | 30.0    | 799            | 10.8    |
| 2002 | 13069  | 21.5    | 2136        | 57.0    | 554          | 7.3     | 2320           | 12.8    | 2062      | 26.4    | 4038          | 25.2    | 1959           | 26.4    |
| 2003 | 17420  | 28.7    | 2117        | 56.5    | 2767         | 36.3(3) | 4691           | 26.0    | 1344      | 17.2    | 3530          | 22.0    | 2971           | 40.0    |
| 2004 | 14013  | 23.1    | 453         | 12.1    | 1223         | 16.0    | 3178           | 17.6    | 2105      | 27.0(3) | 4255          | 26.6    | 2799           | 37.7    |
| 2005 | 19205  | 31.6(3) | 1214        | 32.4    | 2668         | 35.0    | 3623           | 20.1    | 1844      | 23.6    | 4101          | 25.6    | 5755           | 77.4(1) |
| 2006 | 12792  | 21.1    | 1545        | 41.2    | 759          | 9.9     | 1458           | 8.1     | 1365      | 17.5    | 4536          | 28.3    | 3129           | 42.1    |
| 2007 | 12225  | 20.1    | 2325        | 62.0    | 527          | 6.9     | 4189           | 23.2    | 267       | 3.4     | 2018          | 12.6    | 2899           | 39.0    |
| 2008 | 8999   | 14.8    | 1458        | 38.9    | 59           | 0.8     | 885            | 4.9     | 679       | 8.7     | 3534          | 22.1    | 2384           | 32.1    |
| 2009 | 17217  | 28.4    | 1707        | 45.6    | 1389         | 18.2    | 3829           | 21.2    | 997       | 12.8    | 5668          | 35.4(1) | 3627           | 48.8    |
| 2010 | 28952  | 47.7(2) | 2812        | 75.0(2) | 3706         | 48.6(2) | 10512          | 58.2(1) | 2376      | 30.4(2) | 4538          | 28.3    | 5008           | 67.4(2) |
| 2011 | 15263  | 25.1    | 786         | 21.0    | 463          | 6.1     | 4753           | 26.3(3) | 751       | 9.6     | 4958          | 30.9(3) | 3552           | 47.8    |
| 2012 | 13602  | 22.4    | 2339        | 62.4(3) | 714          | 9.4     | 3789           | 21.0    | 1088      | 13.9    | 3698          | 23.1    | 1974           | 26.6    |



Table S7b. Exposure to bleaching-level thermal stress during 7-year periods for all reef locations globally and within reef regions, historically (1985-2012) and projected (centred on 2030 and 2050). Average  $\pm$  SD values correspond to the histograms presented in the right panels of Figure 6. Historical values are calculated from Table S8a. Projected values are based on CMIP5 thermal stress projections using RCP8.5.

| <b>7-year period</b> | <b>Global</b> |            | <b>Middle East</b> |            | <b>Indian Ocean</b> |            | <b>Southeast Asia</b> |            | <b>Australia</b> |            | <b>Pacific Ocean</b> |            | <b>Atlantic Ocean</b> |            |
|----------------------|---------------|------------|--------------------|------------|---------------------|------------|-----------------------|------------|------------------|------------|----------------------|------------|-----------------------|------------|
|                      | Pixels        | %          | Pixels             | %          | Pixels              | %          | Pixels                | %          | Pixels           | %          | Pixels               | %          | Pixels                | %          |
| Historical           | 60710 pixels  |            | 3747 pixels        |            | 7633 pixels         |            | 18066 pixels          |            | 7807 pixels      |            | 16026 pixels         |            | 7431 pixels           |            |
| 1985                 | 4781          | 7.9        | 237                | 6.3        | 634                 | 8.3        | 1067                  | 5.9        | 1044             | 13.4       | 1454                 | 9.1        | 345                   | 4.6        |
| -1991                | $\pm 2045$    | $\pm 3.4$  | $\pm 315$          | $\pm 8.4$  | $\pm 724$           | $\pm 9.5$  | $\pm 599$             | $\pm 3.3$  | $\pm 546$        | $\pm 7.0$  | $\pm 428$            | $\pm 2.7$  | $\pm 384$             | $\pm 5.2$  |
| 1992                 | 8786          | 14.5       | 1299               | 34.7       | 1074                | 14.1       | 2360                  | 13.1       | 741              | 9.5        | 1964                 | 12.3       | 1347                  | 18.1       |
| -1998                | $\pm 9643$    | $\pm 15.9$ | $\pm 1053$         | $\pm 28.1$ | $\pm 1920$          | $\pm 25.2$ | $\pm 3520$            | $\pm 19.5$ | $\pm 805$        | $\pm 10.3$ | $\pm 1810$           | $\pm 11.3$ | $\pm 1714$            | $\pm 23.1$ |
| 1999                 | 13904         | 22.9       | 1527               | 40.8       | 1133                | 14.8       | 3139                  | 17.4       | 1342             | 17.2       | 4261                 | 26.6       | 2501                  | 33.7       |
| -2005                | $\pm 3357$    | $\pm 5.5$  | $\pm 745$          | $\pm 19.9$ | $\pm 1140$          | $\pm 14.9$ | $\pm 895$             | $\pm 5.0$  | $\pm 732$        | $\pm 9.4$  | $\pm 624$            | $\pm 3.9$  | $\pm 1742$            | $\pm 23.4$ |
| 2006                 | 15579         | 25.7       | 1853               | 49.5       | 1088                | 14.3       | 4202                  | 23.3       | 1075             | 13.8       | 4136                 | 25.8       | 3225                  | 43.4       |
| -2012                | $\pm 6427$    | $\pm 10.6$ | $\pm 682$          | $\pm 18.2$ | $\pm 1222$          | $\pm 16.0$ | $\pm 3135$            | $\pm 17.4$ | $\pm 671$        | $\pm 8.6$  | $\pm 1182$           | $\pm 7.4$  | $\pm 986$             | $\pm 13.3$ |
| Projected            | 1687 pixels   |            | 114 pixels         |            | 211 pixels          |            | 454 pixels            |            | 144 pixels       |            | 553 pixels           |            | 211 pixels            |            |
| 2027                 | 1145          | 67.9       | 80                 | 70.6       | 172                 | 81.5       | 408                   | 89.9       | 96               | 66.4       | 339                  | 61.4       | 49                    | 23.3       |
| -2033                | $\pm 221$     | $\pm 13.1$ | $\pm 34$           | $\pm 29.8$ | $\pm 15$            | $\pm 7.1$  | $\pm 43$              | $\pm 9.4$  | $\pm 35$         | $\pm 24.5$ | $\pm 109$            | $\pm 19.8$ | $\pm 14$              | $\pm 6.6$  |
| 2047                 | 1665          | 98.7       | 114                | 100.0      | 211                 | 100.0      | 454                   | 100.0      | 144              | 100.0      | 549                  | 99.1       | 193                   | 91.6       |
| -2053                | $\pm 11$      | $\pm 0.6$  | $\pm 0$            |            | $\pm 0$             |            | $\pm 0$               |            | $\pm 0$          |            | $\pm 3$              | $\pm 0.1$  | $\pm 8$               | $\pm 4.0$  |

Table S8. Regional data distribution for warm-season temperature variability expressed as a percentage of the climatological range, 1985-2012. Light grey shading denotes the approximately one-quarter of sites with highest variability (>20%). These data correspond to the histograms presented in Figure S5.

| <b>Warm-season variability</b> | <b>Middle East</b> |      | <b>Indian Ocean</b> |      | <b>Southeast Asia</b> |      | <b>Australia</b> |      | <b>Pacific Ocean</b> |      | <b>Atlantic Ocean</b> |      |
|--------------------------------|--------------------|------|---------------------|------|-----------------------|------|------------------|------|----------------------|------|-----------------------|------|
|                                | Pixels             | %    | Pixels              | %    | Pixels                | %    | Pixels           | %    | Pixels               | %    | Pixels                | %    |
| <i>Average±SD</i>              | <i>7.9±1.8</i>     |      | <i>17.1±6.6</i>     |      | <i>17.5±7.4</i>       |      | <i>10.1±2.5</i>  |      | <i>22.1±15.6</i>     |      | <i>10.7±5.4</i>       |      |
| 0-5                            | 163                | 4.4  | 2                   | 0    | 164                   | 0.9  | 1                | 0    | 7                    | 0    | 410                   | 5.5  |
| 5-10                           | 3069               | 81.9 | 1071                | 14   | 1420                  | 7.9  | 4355             | 55.8 | 994                  | 6.2  | 3631                  | 48.9 |
| 10-15                          | 512                | 13.7 | 2452                | 32.1 | 6258                  | 34.6 | 3080             | 39.5 | 5335                 | 33.3 | 1925                  | 25.9 |
| 15-20                          | 3                  | 0.1  | 1392                | 18.2 | 5731                  | 31.7 | 282              | 3.6  | 3552                 | 22.2 | 978                   | 13.2 |
| 20-25                          | 0                  | -    | 1645                | 21.6 | 2221                  | 12.3 | 87               | 1.1  | 1975                 | 12.3 | 307                   | 4.1  |
| 25-30                          | 0                  | -    | 873                 | 11.4 | 1008                  | 5.6  | 2                | 0.0  | 1257                 | 7.8  | 145                   | 2    |
| 30-35                          | 0                  | -    | 188                 | 2.5  | 543                   | 3    | 0                | -    | 795                  | 5    | 27                    | 0.4  |
| 35-40                          | 0                  | -    | 9                   | 0.1  | 372                   | 2.1  | 0                | -    | 473                  | 3    | 8                     | 0.1  |
| 40-45                          | 0                  | -    | 1                   | 0.0  | 212                   | 1.2  | 0                | -    | 396                  | 2.5  | 0                     | -    |
| 45-50                          | 0                  | -    | 0                   | -    | 82                    | 0.5  | 0                | -    | 310                  | 1.9  | 0                     | -    |
| 50-55                          | 0                  | -    | 0                   | -    | 44                    | 0.2  | 0                | -    | 252                  | 1.6  | 0                     | -    |
| 55-60                          | 0                  | -    | 0                   | -    | 9                     | 0.0  | 0                | -    | 143                  | 0.9  | 0                     | -    |
| 60-65                          | 0                  | -    | 0                   | -    | 2                     | 0.0  | 0                | -    | 94                   | 0.6  | 0                     | -    |
| 65-70                          | 0                  | -    | 0                   | -    | 0                     | -    | 0                | -    | 63                   | 0.4  | 0                     | -    |
| 70+                            | 0                  | -    | 0                   | -    | 0                     | -    | 0                | -    | 380                  | 2.4  | 0                     | -    |

Table S9. Distribution of residuals from the regression of the change in bleaching stress occurrence with warm-season temperature trend. The line separating the second and third rows corresponds to the regression line in Figure 7; and the first and fourth rows indicate residuals with magnitude exceeding one standard error of estimate (SE = 1.37). The change in bleaching stress occurrence was determined as the difference in number of bleaching-level stress events (DHW ≥ 4 °C-weeks) between the 1985-1991 and 2006-2012 periods.

| <b>Residual</b> | <b>Pixels</b> | <b>%</b> |
|-----------------|---------------|----------|
| < -SE           | 8704          | 14.3     |
| < 0 and > -SE   | 19363         | 31.9     |
| >0 and < SE     | 23227         | 38.3     |
| > SE            | 9416          | 15.5     |

Table S10. Regional data distribution for climatologically warmest month, 1985-2012. These data correspond to histograms presented in Figure S3.

| <b>Warmest month</b> | <b>Middle East</b> |      | <b>Indian Ocean</b> |      | <b>Southeast Asia</b> |      | <b>Australia</b> |      | <b>Pacific Ocean</b> |       | <b>Atlantic Ocean</b> |      |
|----------------------|--------------------|------|---------------------|------|-----------------------|------|------------------|------|----------------------|-------|-----------------------|------|
|                      | Pixels             | %    | Pixels              | %    | Pixels                | %    | Pixels           | %    | Pixels               | %     | Pixels                | %    |
| January              | 0                  | -    | 44                  | 0.6  | 296                   | 1.6  | 2447             | 31.3 | 2180                 | 13.6% | 0                     | -    |
| February             | 0                  | -    | 419                 | 5.5  | 158                   | 0.9  | 3835             | 49.1 | 3897                 | 24.3% | 2                     | 0.0  |
| March                | 0                  | -    | 1249                | 16.4 | 290                   | 1.6  | 338              | 4.3  | 3384                 | 21.1% | 97                    | 1.3  |
| April                | 0                  | -    | 4276                | 56.0 | 3222                  | 17.8 | 641              | 8.2  | 443                  | 2.8%  | 194                   | 2.6  |
| May                  | 72                 | 1.9  | 920                 | 12.1 | 4964                  | 27.5 | 22               | 0.3  | 338                  | 2.1%  | 72                    | 1.0  |
| June                 | 68                 | 1.8  | 564                 | 7.4  | 5351                  | 29.6 | 0                | -    | 438                  | 2.7%  | 87                    | 1.2  |
| July                 | 33                 | 0.9  | 6                   | 0.1  | 651                   | 3.6  | 0                | -    | 58                   | 0.4%  | 44                    | 0.6  |
| August               | 2040               | 54.4 | 0                   | -    | 769                   | 4.3  | 0                | -    | 80                   | 0.5%  | 1586                  | 21.3 |
| September            | 573                | 15.3 | 0                   | -    | 114                   | 0.6  | 0                | -    | 959                  | 6.0%  | 3573                  | 48.1 |
| October              | 934                | 24.9 | 151                 | 2.0  | 410                   | 2.3  | 0                | -    | 1309                 | 8.2%  | 1738                  | 23.4 |
| November             | 27                 | 0.7  | 1                   | 0.0  | 968                   | 5.4  | 29               | 0.4  | 1586                 | 9.9%  | 38                    | 0.5  |
| December             | 0                  | -    | 3                   | 0.0  | 873                   | 4.8  | 495              | 6.3  | 1354                 | 8.4%  | 0                     | -    |

Table S11. Regional data distribution for mean onset (month) of bleaching-level thermal stress events, 1985-2012. These data correspond to histograms presented in Figure S4.

| <b>Mean onset</b> | <b>Middle East</b> |      | <b>Indian Ocean</b> |      | <b>Southeast Asia</b> |      | <b>Australia</b> |      | <b>Pacific Ocean</b> |      | <b>Atlantic Ocean</b> |      |
|-------------------|--------------------|------|---------------------|------|-----------------------|------|------------------|------|----------------------|------|-----------------------|------|
|                   | Pixels             | %    | Pixels              | %    | Pixels                | %    | Pixels           | %    | Pixels               | %    | Pixels                | %    |
| January           | 0                  | -    | 696                 | 9.6  | 1555                  | 9.2  | 3859             | 57.0 | 3773                 | 25.8 | 6                     | 0.1  |
| February          | 0                  | -    | 1431                | 19.8 | 762                   | 4.5  | 1573             | 23.2 | 3344                 | 22.8 | 81                    | 1.1  |
| March             | 0                  | -    | 1437                | 19.9 | 378                   | 2.2  | 176              | 2.6  | 846                  | 5.8  | 144                   | 2.0  |
| April             | 12                 | 0.3  | 2915                | 40.4 | 929                   | 5.5  | 15               | 0.2  | 78                   | 0.5  | 34                    | 0.5  |
| May               | 55                 | 1.5  | 432                 | 6.0  | 2962                  | 17.6 | 0                | -    | 45                   | 0.3  | 7                     | 0.1  |
| June              | 83                 | 2.2  | 36                  | 0.5  | 2830                  | 16.8 | 0                | -    | 144                  | 1.0  | 143                   | 2.0  |
| July              | 778                | 20.8 | 48                  | 0.7  | 2574                  | 15.3 | 0                | -    | 571                  | 3.9  | 2569                  | 35.3 |
| August            | 2324               | 62.2 | 59                  | 0.8  | 983                   | 5.8  | 0                | -    | 1493                 | 10.2 | 3314                  | 45.5 |
| September         | 464                | 12.4 | 45                  | 0.6  | 472                   | 2.8  | 0                | -    | 1240                 | 8.5  | 975                   | 13.4 |
| October           | 21                 | 0.6  | 39                  | 0.5  | 413                   | 2.4  | 0                | -    | 469                  | 3.2  | 6                     | 0.1  |
| November          | 1                  | 0.0  | 16                  | 0.2  | 1043                  | 6.2  | 92               | 1.4  | 503                  | 3.4  | 0                     | -    |
| December          | 1                  | 0.0  | 66                  | 0.9  | 1973                  | 11.7 | 1057             | 15.6 | 2129                 | 14.5 | 2                     | 0.0  |
| No Events         | 8                  | 0.2  | 413                 | 5.7  | 1192                  | 7.1  | 1035             | 15.3 | 1391                 | 9.5  | 150                   | 2.1  |

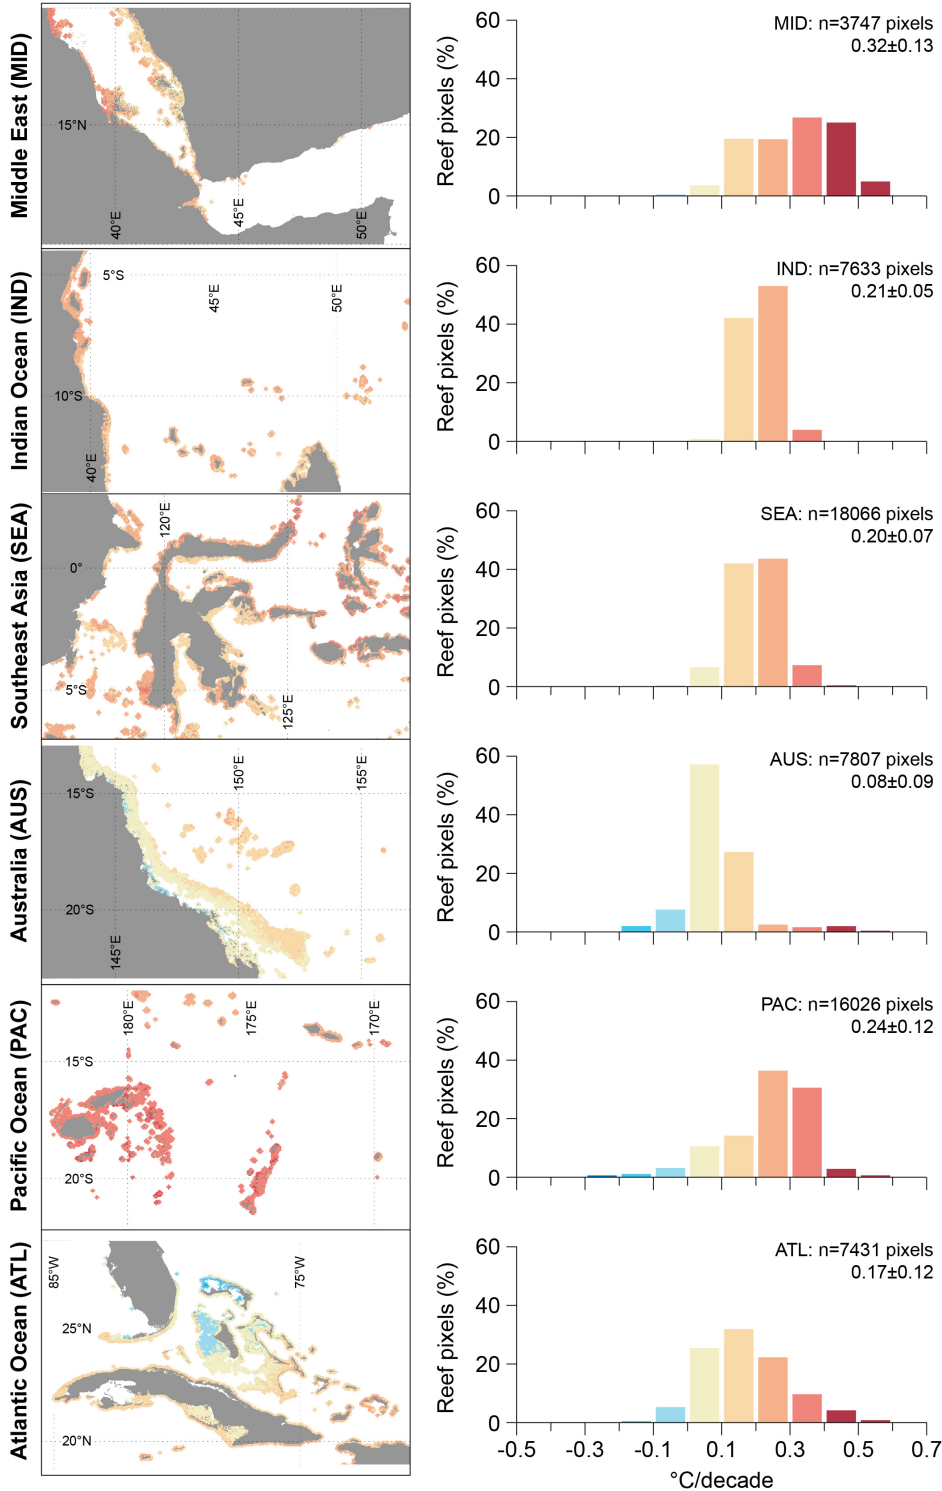

Fig. S1. **Trend in annual temperatures among reef regions, 1985-2012.** Trend values are in °C/decade. Maps (left) show results for a subset of each region; histograms (right) show the distribution of results in the full region with the regional average  $\pm$  one standard deviation. Reef regions are as per Burke et al. 2011. Data are provided for each histogram in Table S2. Data visualisations produced using IDL [8.3] (Exelis Visual Information Solutions, Boulder, Colorado).

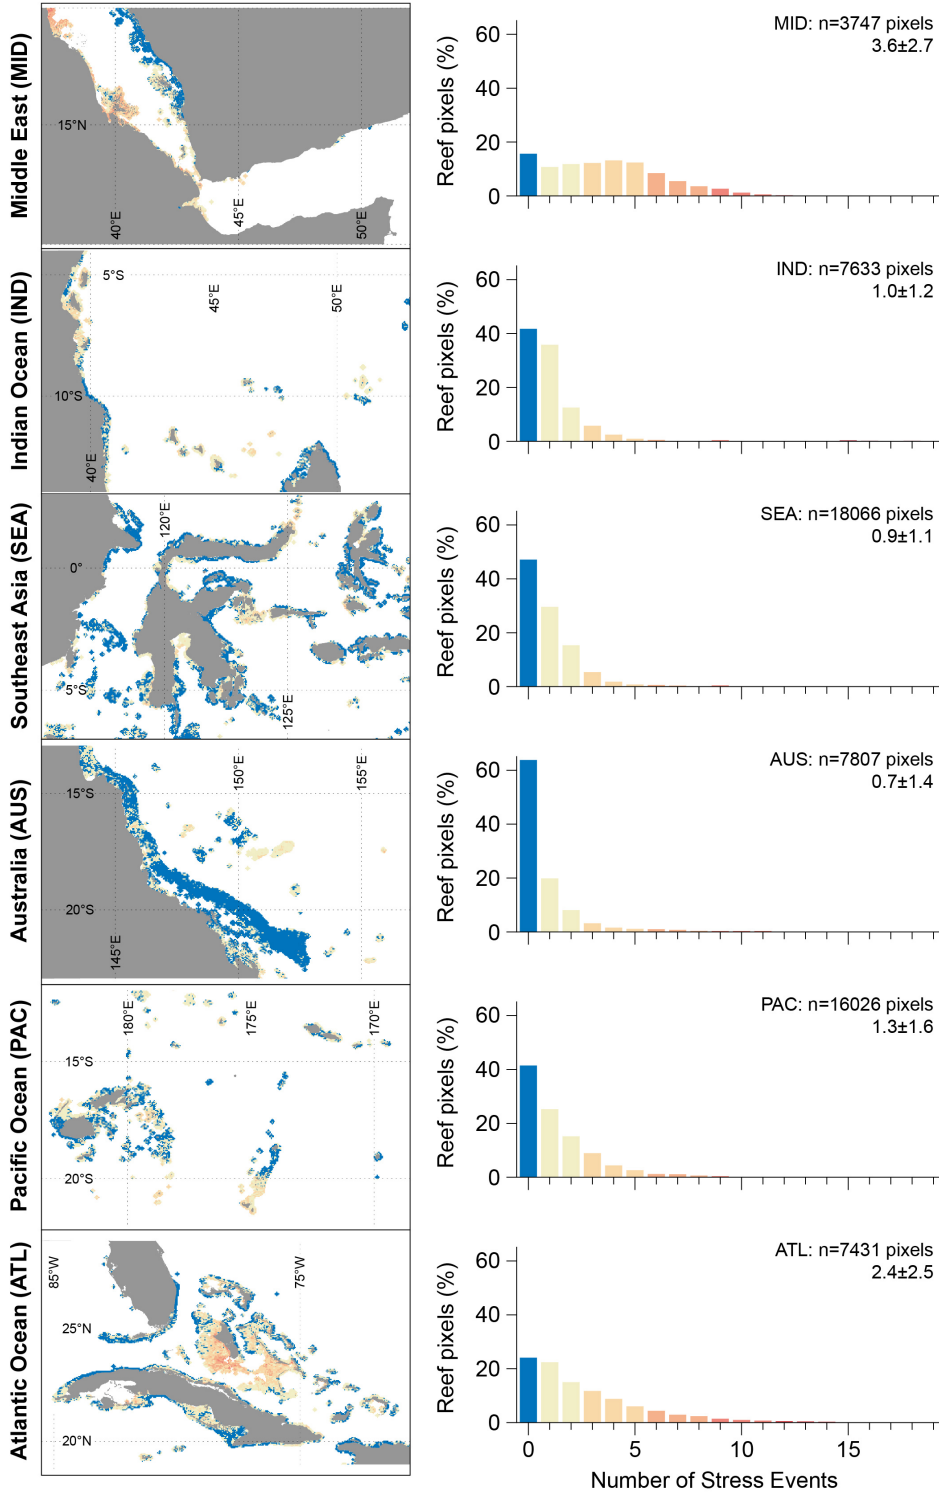

**Fig. S2 Frequency of mortality-level thermal stress events among reef regions, 1985-2012.** Mortality-level stress defined as  $DHW \geq 4$  °C-weeks. Maps (left) show results for a subset of each region; histograms (right) show the distribution of results in the full region with the regional average  $\pm$  one standard deviation. Reef regions are as per Burke et al. 2011. Data are provided for each histogram in Table S6. Data visualisations produced using IDL [8.3] (Exelis Visual Information Solutions, Boulder, Colorado).

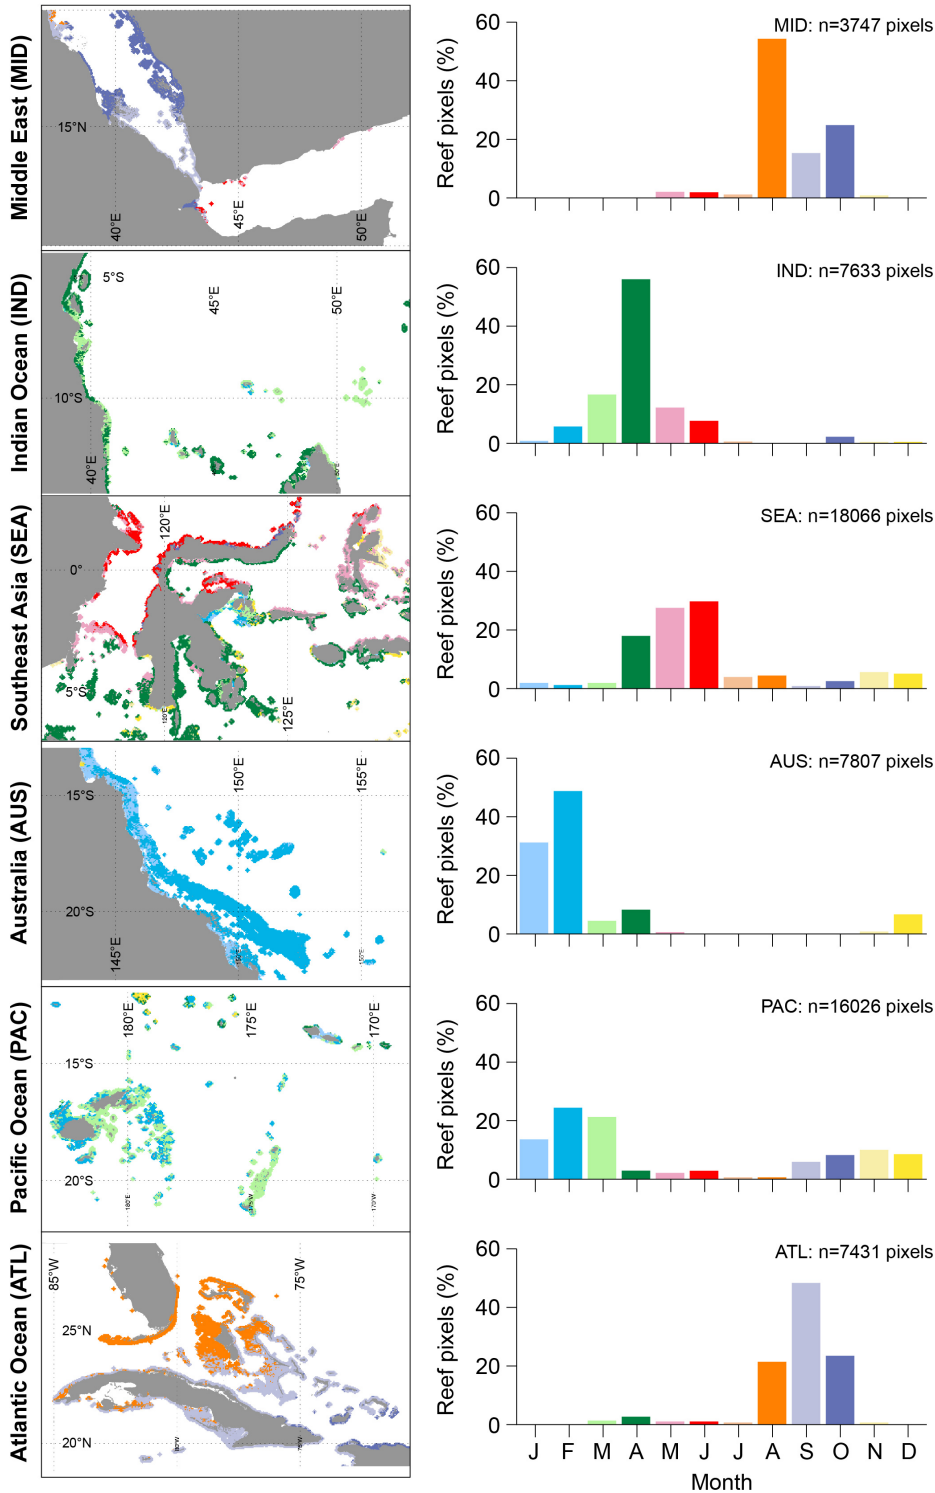

Fig. S3. **Distribution of climatologically Warmest Month among reef regions, 1985-2012.** Maps (left) show results for a subset of each region; histograms (right) show the distribution of results in the full region. Reef regions are as per Burke et al. 2011. Data are provided for each histogram in Table S10. Data visualisations produced using IDL [8.3] (Exelis Visual Information Solutions, Boulder, Colorado).

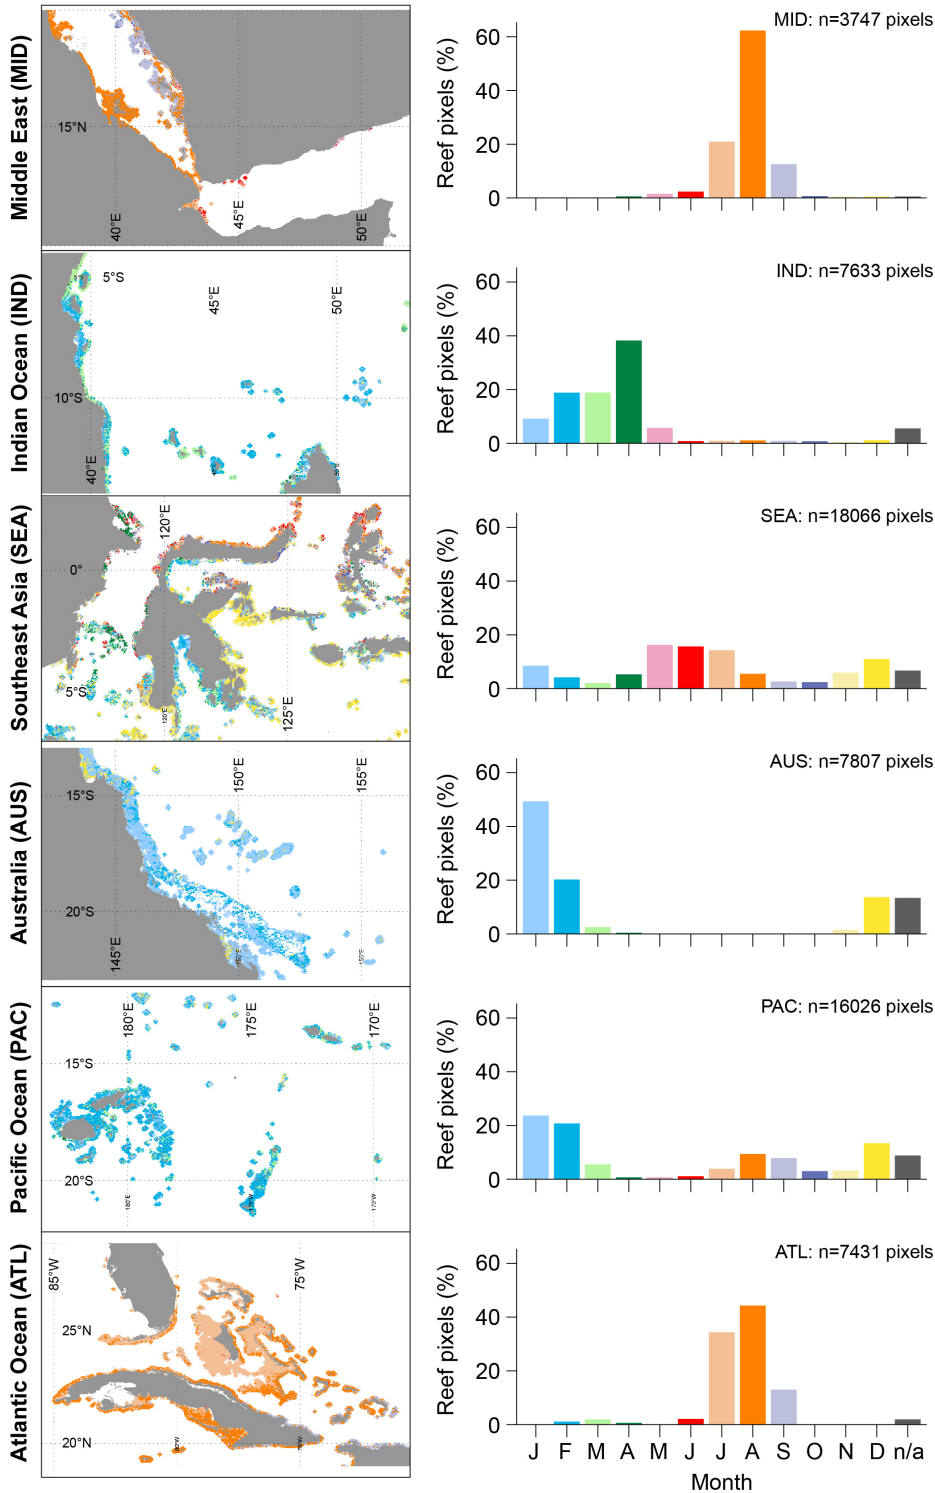

Fig. S4. **Distribution of Mean Onset (month) among reef regions, 1985-2012.** Maps (left) show results for a subset of each region; histograms (right) show the distribution of results in the full region. Reef regions are as per Burke et al. 2011. Data are provided for each histogram in Table S11. Data visualisations produced using IDL [8.3] (Exelis Visual Information Solutions, Boulder, Colorado).

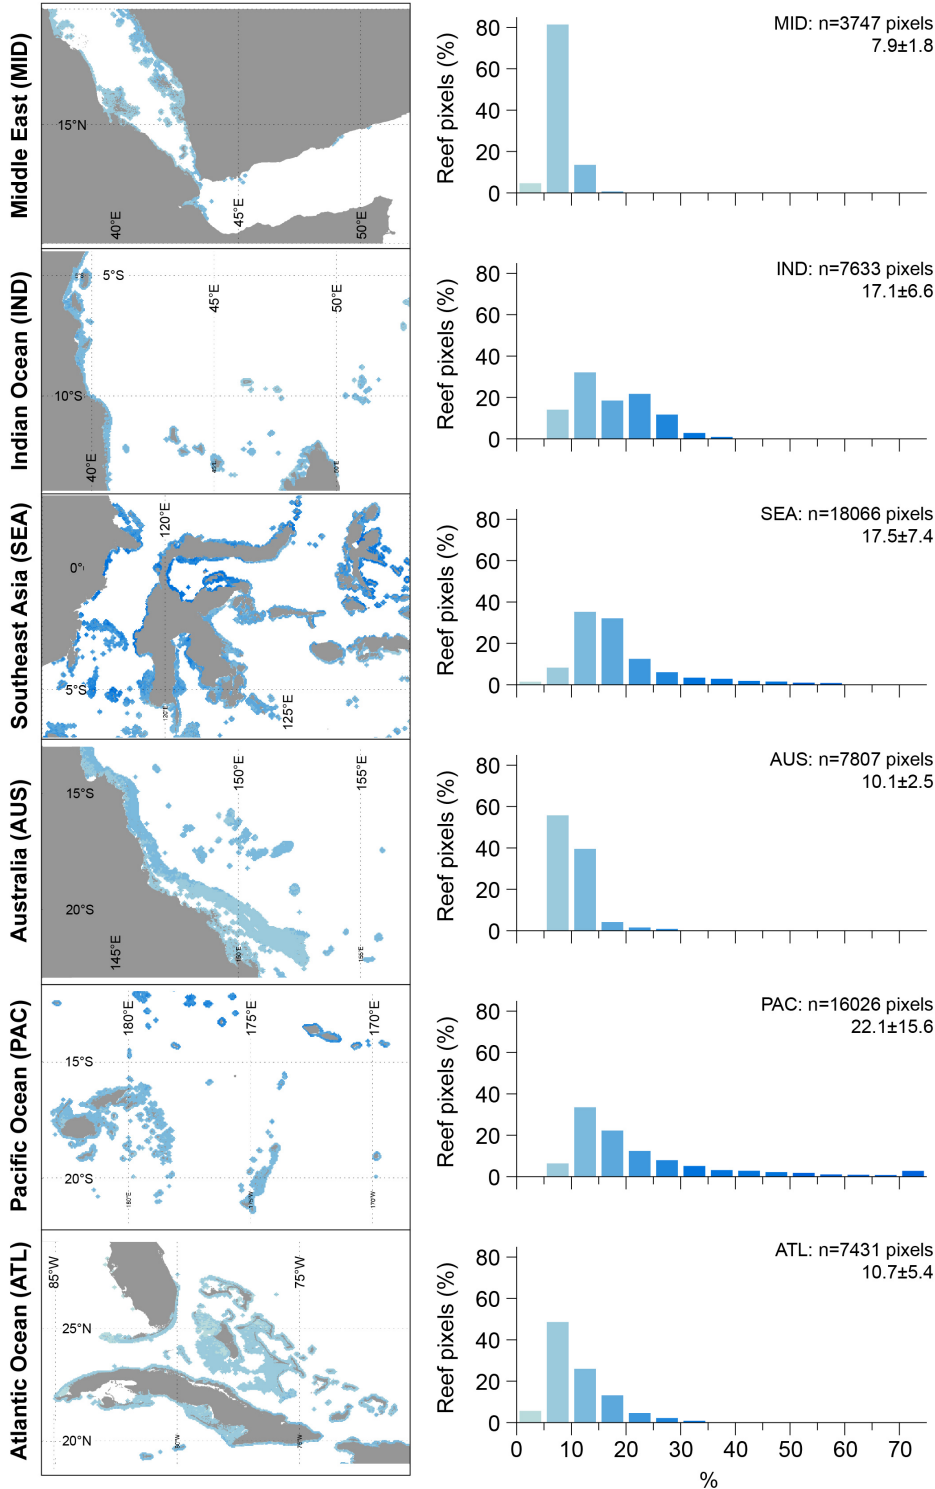

Fig. S5. **Warm-season variability among reef regions, 1985-2012.** Values are expressed as a percentage of the climatological range. Maps (left) show results for a subset of each region; histograms (right) show the distribution of results in the full region with the regional average  $\pm$  one standard deviation. Reef regions are as per Burke et al. 2011. Data are provided for each histogram in Table S8. Data visualisations produced using IDL [8.3] (Exelis Visual Information Solutions, Boulder, Colorado).



Supplementary Material: *Warming Trends and Bleaching Stress of the World's Coral Reefs 1985-2012*, SF Heron, J Maynard, R van Hooidonk, CM Eakin.

**Figure S6. Reef locations with high and low historical exposure to bleaching-level thermal stress.**

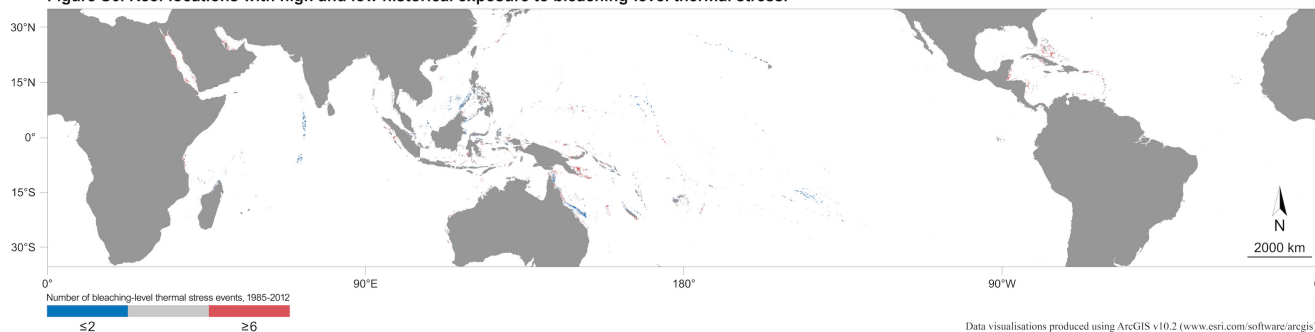

Data visualisations produced using ArcGIS v10.2 ([www.esri.com/software/arcgis](http://www.esri.com/software/arcgis)).

**Fig. S6. Reef locations with high and low historical exposure to bleaching-level thermal stress.** High-resolution map (available from [coralreefwatch.noaa.gov/publications/HeronEtAl\\_2016.php](http://coralreefwatch.noaa.gov/publications/HeronEtAl_2016.php)) identifies reefs for which the frequency of thermal stress events during 1985-2012 that reached or exceeded Degree Heating Weeks of 4 °C-weeks was less than 1/decade (low) or was greater than 2/decade (high). Data visualisations produced using ArcGIS v10.2 ([www.esri.com/software/arcgis](http://www.esri.com/software/arcgis)).

Supplementary Material: *Warming Trends and Bleaching Stress of the World's Coral Reefs 1985-2012*, SF Heron, J Maynard, R van Hooidonk, CM Eakin.

**Figure S7. Reef locations with lower than expected increase in bleaching-level exposure.**

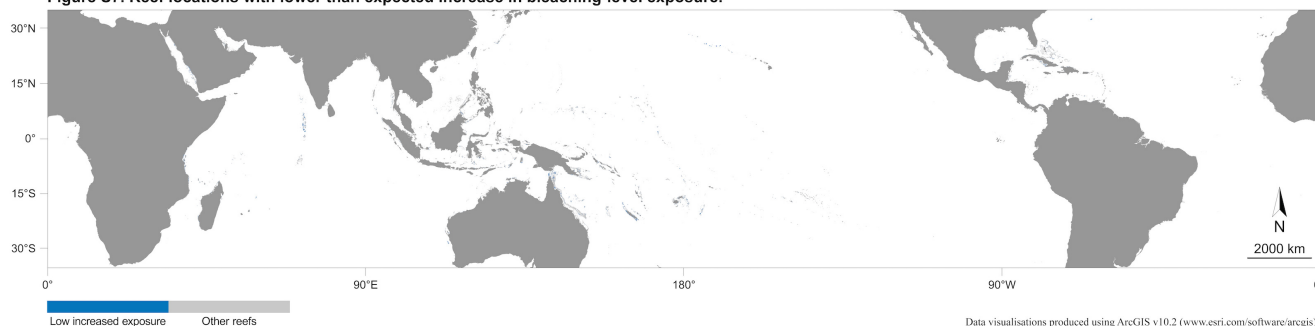

Data visualisations produced using ArcGIS v10.2 ([www.esri.com/software/arcgis](http://www.esri.com/software/arcgis)).

**Fig. S7. Reef locations with lower than expected increase in bleaching-level exposure.** High-resolution map (available from [coralreefwatch.noaa.gov/publications/HeronEtAl\\_2016.php](http://coralreefwatch.noaa.gov/publications/HeronEtAl_2016.php)) identifies reefs for which the difference in number of bleaching-level stress events (DHW  $\geq$  4 °C-weeks) between the 1985-1991 and 2006-2012 periods was less than expected based on the local warm-season trend. The relationship between these is shown in Figure 7. Data visualisations produced using ArcGIS v10.2 ([www.esri.com/software/arcgis](http://www.esri.com/software/arcgis)).

Supplementary Material: *Warming Trends and Bleaching Stress of the World's Coral Reefs 1985-2012*, SF Heron, J Maynard, R van Hooidonk, CM Eakin.

**Figure S8. Reef locations with highest warm season variability.**

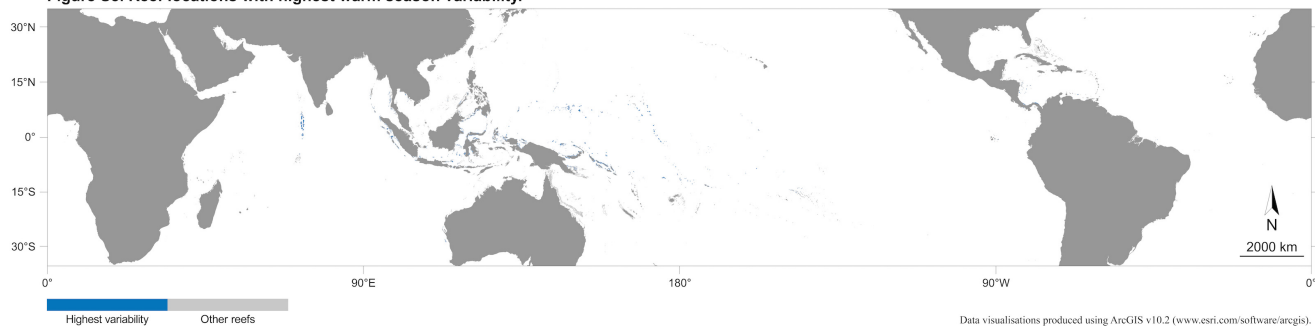

Data visualisations produced using ArcGIS v10.2 ([www.esri.com/software/arcgis](http://www.esri.com/software/arcgis)).

**Fig. S8. Reef locations with highest warm-season variability.** High-resolution map (available from [coralreefwatch.noaa.gov/publications/HeronEtAl\\_2016.php](http://coralreefwatch.noaa.gov/publications/HeronEtAl_2016.php)) identifies reefs for which the variability in warm-season temperature was at least 20% of the climatological range in temperature. Data visualisations produced using ArcGIS v10.2 ([www.esri.com/software/arcgis](http://www.esri.com/software/arcgis)).
